# Supplementary material for: Computational Discovery of New Feasible Crystal Structures in Ce3O3N
Source: MDPI journal article supplement (doi:10.3390/cryst13050774), 2023-05-06
Supplement: s1 [file s1]

# Supplementary Information

**Table S1.** Bond lengths inside of different coordination polyhedra for various  $\text{Ce}_3\text{O}_3\text{N}$  modifications.

|                                     |                                                                                                                      |                                                                    |
|-------------------------------------|----------------------------------------------------------------------------------------------------------------------|--------------------------------------------------------------------|
| $\text{Ce}_3\text{O}_3\text{N-DM1}$ | VIII<br>2.4161 O<br>2.4511 O<br>2.4595 O<br>2.5330 O<br>2.5590 O<br>2.5815 O<br>2.3611 N<br>2.4780 N<br>Mean: 2.4799 |                                                                    |
| $\text{Ce}_3\text{O}_3\text{N-GS1}$ | VII<br>2.2997 O<br>2.3643 O<br>2.3643 O<br>2.3856 O<br>2.7420 O<br>2.4369 N<br>2.4369 N<br>Mean: 2.4328              | VI<br><br>4 x 2.3437 O<br>2 x 2.5150 N                             |
| $\text{Ce}_3\text{O}_3\text{N-GS2}$ | VI<br>2 x 2.4670 O<br>2 x 2.4115 O<br>2.2266 O<br>2.1871 N<br>Mean: 2.3618                                           | VI<br>2 x 2.3268 O<br>2 x 2.6067 O<br>2 x 2.3276 N<br>Mean: 2.4204 |
| $\text{Ce}_3\text{O}_3\text{N-GS3}$ | VII<br>2 x 2.3774 O<br>4 x 2.4257 O<br>2.6800 N<br>Mean: 2.4482                                                      | VI<br>2.2823 O<br>2.2860 O<br>4 x 2.3937 N<br>Mean: 2.3572         |
| $\text{Ce}_3\text{O}_3\text{N-GS4}$ | VI<br>4 x 2.2907 O<br>2 x 2.3121 N<br>Mean: 2.2979                                                                   | VI<br>2 x 2.3351 O<br>2 x 2.4093 O<br>2 x 2.5117 N<br>Mean: 2.4187 |
| $\text{Ce}_3\text{O}_3\text{N-GS5}$ | VII<br>2 x 2.2905 O<br>4 x 2.4481 O<br>2.7377 N<br>Mean: 2.4445                                                      | VI<br>2.2501 O<br>2.3900 O<br>4 x 2.4106 N<br>Mean: 2.3804         |

|                                      |                                                    |                                                                    |
|--------------------------------------|----------------------------------------------------|--------------------------------------------------------------------|
| Ce <sub>3</sub> O <sub>3</sub> N-GS6 | VI<br>4 x 2.2929 O<br>2 x 2.3145 N<br>Mean: 2.3001 | VI<br>2 x 2.3372 O<br>2 x 2.4108 O<br>2 x 2.5123 N<br>Mean: 2.4201 |
| Ce <sub>3</sub> O <sub>3</sub> N-GS7 | VI<br>6 x 2.3756 O                                 |                                                                    |

**Table S2.** Space group, unit cell parameters (Å), atomic positions, and total energy values in Hartrees ( $E_h$ ) for eight optimized modifications found using the global search method.

| Modification                         | Space group (no.) | Cell parameters (Å) and fractional coordinates                                                                                                                     | Total energy (E <sub>h</sub> ) |
|--------------------------------------|-------------------|--------------------------------------------------------------------------------------------------------------------------------------------------------------------|--------------------------------|
| Ce <sub>3</sub> O <sub>3</sub> N-GS1 | <i>P2/m</i> (10)  | $a = 5.89; b = 3.62; c = 5.04; \beta = 113.2^\circ$<br>Ce (0 0 0)<br>Ce (0.3017 1/2 0.6238)<br>O (0.2702 1/2 0.0652)<br>O (1/2 0 1/2)<br>N (0 0 1/2)               | -1702.4813                     |
| Ce <sub>3</sub> O <sub>3</sub> N-GS2 | <i>Amm2</i> (38)  | $a = 3.59; b = 9.83; c = 5.78$<br>Ce (1/2 0.1729 0.8911)<br>Ce (0 0 0.3964)<br>Ce (1/2 0 0.8038)<br>O (0.5 0 0.1402)<br>O (0 0.7712 0.1681)<br>N (1/2 0 0.6528)    | -1702.4685                     |
| Ce <sub>3</sub> O <sub>3</sub> N-GS3 | <i>Imm2</i> (44)  | $a = 3.38; b = 3.39; c = 17.39$<br>Ce (0 0 0.7735)<br>Ce (0 0 0.4276)<br>Ce (0 0 0.0814)<br>O (0 0 0.5589)<br>O (0 0 0.2961)<br>O (0 1/2 0.1775)<br>N (0 0 0.9277) | -1702.4627                     |
| Ce <sub>3</sub> O <sub>3</sub> N-GS4 | <i>Pmmm</i> (47)  | $a = 6.86; b = 3.53; c = 4.62$<br>Ce (1/2 0 0)<br>Ce (0.7607 1/2 1/2)<br>O (0.2869 1/2 0)<br>O (0 0 1/2)<br>N (1/2 0 1/2)                                          | -1702.4588                     |
| Ce <sub>3</sub> O <sub>3</sub> N-GS5 | <i>Amm2</i> (38)  | $a = 3.49; b = 3.32; c = 17.93$<br>Ce (1/2 0 0.0970)<br>Ce (0 0 0.4475)<br>Ce (1/2 0 0.8038)<br>O (0 0 0.5730)<br>O (0 0 0.3143)                                   | -1702.4576                     |

|                                         |                    |                                                                                                                         |            |
|-----------------------------------------|--------------------|-------------------------------------------------------------------------------------------------------------------------|------------|
|                                         |                    | O (1/2 0 0.6850)<br>N (1/2 0 0.9444)                                                                                    |            |
| <b>Ce<sub>3</sub>O<sub>3</sub>N-GS6</b> | <i>Pmmm</i> (47)   | $a = 3.53; b = 4.63; c = 6.85$<br>Ce (0 0 0)<br>Ce (1/2 1/2 0.7394)<br>O (1/2 0 0.2132)<br>O (0 1/2 1/2)<br>N (0 1/2 0) | -1702.4509 |
| <b>Ce<sub>3</sub>O<sub>3</sub>N-GS7</b> | <i>Pm-3m</i> (221) | $a = 4.75$<br>Ce (1/2 0 1/2)<br>O (0 1/2 0)<br>N (1/2 1/2 1/2)                                                          | -1702.4394 |

Data mining of the ICSD database gave us 19 candidates with the general formula  $A_3B_3C$ . Every candidate was used as the starting structure type for *ab initio* optimization of the  $Ce_3O_3N$  compound. The initial structures and their references are:  $Al_3ScC_3$ [1],  $Ba_3FeN_3$ [2],  $Ca_3Pb_3$ [3],  $Ca_3InP_3$ [4],  $Cu_3SbS_3$ [5],  $Fe_3TiTe_3$ [6],  $Fe_3W_3C$ [7],  $Gd_3MnI_3$ [8],  $K_3AlSe_3$ [9],  $K_3BS_3$ [10],  $K_6Sn_2Te_6$ [11],  $KB_3H_3$ [12],  $Na_3AsS_3$ [13],  $Ni_3SmGe_3$ [14],  $NiSc_3Si_3$ [15], [2] (proustite)[16],  $Rh_4C_{12}O_{12}$ [17],  $Tl_3AsSe_3$ [18],  $Ag_3AsS_3$  (xanthoconite)[19].

**Table S3.** Space group, unit cell parameters (Å), atomic positions, and total energy values in Hartrees ( $E_h$ ) for three optimized modifications found using the data mining method.

| Modification                            | Space group (no.)             | Cell parameters (Å) and fractional coordinates                                                           | Total energy ( $E_h$ ) |
|-----------------------------------------|-------------------------------|----------------------------------------------------------------------------------------------------------|------------------------|
| <b>Ce<sub>3</sub>O<sub>3</sub>N-DM1</b> | <i>R3c</i> (161)              | $a = 10.17; c = 6.15$<br>Ce (-0.1996 -0.0378 0.2416)<br>O (-0.0656 0.2200 0.3762)<br>N (0 0 0.0066)      | -1702.4875             |
| <b>Ce<sub>3</sub>O<sub>3</sub>N-DM2</b> | <i>P6<sub>3</sub>/m</i> (176) | $a = 7.21; c = 4.75$<br>Ce (0.3715 0.3398 1/4)<br>O (0.2747 0.9691 1/4)<br>N (2/3 1/3 1/4)               | -1702.4007             |
| <b>Ce<sub>3</sub>O<sub>3</sub>N-DM3</b> | <i>I-43m</i> (217)            | $a = 10.49$<br>Ce (1/2 0 1/4)<br>Ce (0 0 0.2430)<br>O (0.8876 0.6093 0.1124)<br>N (0.1159 0.1159 0.8841) | -1702.2837             |

**Table S4.** Total energy ranking in eV for the best candidates from the global energy landscape and data-mining searches ( $Ce_3O_3N$ -DM1, and  $Ce_3O_3N$ -GS1) and literature data [20] calculated using the VASP code and the LDA functional.

| Modification                         | Space group (no.)             | Total energy (eV) |
|--------------------------------------|-------------------------------|-------------------|
| Ce <sub>3</sub> O <sub>3</sub> N-DM1 | <i>R3c</i> (161)              | -65.8541          |
| Ce <sub>3</sub> O <sub>3</sub> N-GS1 | <i>P6<sub>3</sub>/m</i> (176) | -65.7261          |
| Literature*                          | <i>P2<sub>1</sub></i> (no. 4) | -65.5338          |

## References

1. Tsokol, A. O., Bodak, O. I., Marusin, E. P., Baivelman, M. G., Crystal structure of the compound ScAl<sub>3</sub>C<sub>3</sub>. *Soviet Physics, Crystallography (=Kristallografiya)* **1986**, 31, 467-468.
2. Rabenau, A.; Kniep, R.; Höhn, P., Ba<sub>3</sub>[FeN<sub>3</sub>]: Ein neues Nitridoferrat(III) mit [CO<sub>3</sub>]<sub>2</sub>--isosteren Anionen [FeN<sub>3</sub>]<sub>6</sub>. **1991**, 196, (1-4), 153-158.
3. Lang, J.; Hamon, C.; Marchand, R.; Laurent, Y., Étude d'halogénopnictures. III. Structure de Ca<sub>2</sub>PI et Ca<sub>3</sub>PI<sub>3</sub>. Surstructures de type NaCl. *Bulletin de Minéralogie* **1974**, 6-12.
4. Cordier, G., Schaefer, H., Stelter, M., Neue Zintlphasen: Ba<sub>3</sub>GaSb<sub>3</sub>, Ca<sub>3</sub>GaAs<sub>3</sub> und Ca<sub>3</sub>InP<sub>3</sub>. *Zeitschrift fuer Naturforschung, Teil B: Anorganische Chemie, Organische Chemie* **1985**, 40, 1100-1104.
5. Machatsehki, F., XII. Präzisionsmessungen der Gitterkonstanten verschiedener Fahlerze. *Formel und Struktur derselben* **1928**, 68, (1-6), 204-222.
6. Klepp, K.; Boller, H., Die Kristallstruktur von TlFe<sub>3</sub>Te<sub>3</sub>. *Monatshefte für Chemie / Chemical Monthly* **1979**, 110, (3), 677-684.
7. Pollock, C. B.; Stadelmaier, H. H., The eta carbides in the Fe-W-C and Co-W-C systems. *Metallurgical Transactions* **1970**, 1, (4), 767-770.
8. Ebihara, M.; Martin, J. D.; Corbett, J. D., Novel Chain and Oligomeric Condensed Cluster Phases for Gadolinium Iodides with Manganese Interstitials. *Inorganic Chemistry* **1994**, 33, (10), 2079-2084.
9. Crystal structure of hexapotassium di-μ-selenido-bis(diselenidoaluminate), K<sub>6</sub>Al<sub>2</sub>Se<sub>6</sub>. *Zeitschrift für Kristallographie* **1991**, 197, (1-2), 173-174.
10. Kuchinke, J.; Jansen, C.; Lindemann, A.; Krebs, B., Syntheses and Crystal Structures of the Novel Ternary Thioborates Na<sub>3</sub>BS<sub>3</sub>, K<sub>3</sub>BS<sub>3</sub>, and Rb<sub>3</sub>BS<sub>3</sub>. *Zeitschrift für anorganische und allgemeine Chemie* **2001**, 627, (5), 896-902.
11. Dittmar, G., Die Kristallstrukturen von K<sub>6</sub>[Ge<sub>2</sub>Te<sub>6</sub>] und K<sub>6</sub>[Sn<sub>2</sub>Te<sub>6</sub>] und ihre kristall-chemische Beziehung zum K<sub>6</sub>[Si<sub>2</sub>Te<sub>6</sub>]-Typ. *Zeitschrift für anorganische und allgemeine Chemie* **1979**, 453, (1), 68-78.
12. Kuznetsov, I. Y., Vinitskii, D. M., Solntsev, K. A., Kuznetsov, N. T., Butman, L. A., The crystal structure of K<sub>2</sub>B<sub>6</sub>H<sub>6</sub> and Cs<sub>2</sub>B<sub>6</sub>H<sub>6</sub>. *Zhurnal Neorgnicheskoi Khimii* **1987**, 32, 3112-3114.
13. Palazzi, M., Structure cristalline de l'orthotritioarsenite trisodique Na<sub>3</sub>AsS<sub>3</sub>. *Acta Crystallographica Section B* **1976**, 32, (12), 3175-3177.
14. Mruz, O. Y., Pecharskii, V. K., Sobolev, A. N., Bodak, O. I., Crystal structure of SmNi<sub>3</sub>Ge<sub>3</sub>. *Kristallografiya* **1990**, 35, 202-204.
15. Kotur, B. Y., Gladyshevskii, E. I., Crystal structure of scandium-nickel silicide (Sc<sub>3</sub>NiSi<sub>3</sub>). *Kristallografiya* **1983**, 28, 461-464.
16. Harker, D., The Application of the Three-Dimensional Patterson Method and the Crystal Structures of Proustite, Ag<sub>3</sub>AsS<sub>3</sub>, and Pyrargyrite, Ag<sub>3</sub>SbS<sub>3</sub>. *The Journal of Chemical Physics* **1936**, 4, (6), 381-390.

17. Wei, C. H., Structural analyses of tetracobalt dodecacarbonyl and tetrarhodium dodecacarbonyl. Crystallographic treatments of a disordered structure and a twinned composite. *Inorganic Chemistry* **1969**, 8, (11), 2384-2397.
18. Hong, H. Y. P.; Mikkelsen, J. C.; Roland, G. W., Crystal structure of  $\text{Ti}_3\text{AsSe}_3$ . *Materials Research Bulletin* **1974**, 9, (4), 365-369.
19. Engel, P.; Nowacki, W., Die Kristallstruktur von Xanthokon,  $\text{Ag}_3\text{AsS}_3$ . *Acta Crystallographica Section B* **1968**, 24, (1), 77-81.
20. Sharan, A.; Lany, S., Computational discovery of stable and metastable ternary oxynitrides. *The Journal of Chemical Physics* **2021**, 154, (23), 234706.
